# Supplementary material
Source: publisher site journal article supplement (https://www.dovepress.com/article/577080)
Supplement: Supplementary file 1 [file 577080%20Supplementary%20Material.docx]

**Supplementary**

Table of Contents:

[Supplementary 1: PRISMA Checklist 1](#_Toc534204563)

[Supplementary 2: Search Strategy 4](#_Toc1894445881)

[Supplementary 3: Characteristics of studies and subjects included in the review 7](#_Toc1347370016)

[Supplementary 4: Risk of Bias 28](#_Toc1262935083)

[Supplementary 5: Publication bias 3](#_Toc431254745)0

**Supplementary 1: PRISMA Checklist**

| Item # | Checklist Item | Reported on Page # |
| --- | --- | --- |
|  |  |  |
| 1 | Identify the report as a systematic review incorporating a network meta-analysis (or related form of meta-analysis). | 1 |
| 2 | Provide a structured summary including, as applicable:  **Background:** main objectives  **Methods:** data sources; study eligibility criteria, participants, and interventions; study appraisal; and *synthesis methods, such as network meta-analysis.*  **Results:** number of studies and participants identified; summary estimates with corresponding confidence/credible intervals; treatment rankings may also be discussed. Authors may choose to summarize pairwise comparisons against a chosen treatment included in their analyses for brevity.  **Discussion/Conclusions:** limitations; conclusions and implications of findings.  **Other:** primary source of funding; systematic review registration number with registry name. | 1-2 |
| 3 | Describe the rationale for the review in the context of what is already known*, including mention of why a meta-analysis of randomized controlled trials has been conducted.* | 3-5 |
| 4 | Provide an explicit statement of questions being addressed, with reference to participants, interventions, comparisons, outcomes, and study design (PICOS). | 5-6 |
| 5 | Indicate whether a review protocol exists and if and where it can be accessed (e.g., Web address); and, if available, provide registration information, including registration number. | 5 |
| 6 | Specify study characteristics (e.g., PICOS, length of follow-up) and report characteristics (e.g., years considered, language, publication status) used as criteria for eligibility, giving rationale. *Clearly describe eligible treatments included in the treatment network, and note whether any have been clustered or merged into the same node (with justification).* | 5-7 |
| 7 | Describe all information sources (e.g., databases with dates of coverage, contact with study authors to identify additional studies) in the search and date last searched. | 5 |
| 8 | Present full electronic search strategy for at least one database, including any limits used, such that it could be repeated. | Supplementary 2 |
| 9 | State the process for selecting studies (i.e., screening, eligibility, included in systematic review, and, if applicable, included in the meta-analysis). | 6 |
| 10 | Describe method of data extraction from reports (e.g., piloted forms, independently, in duplicate) and any processes for obtaining and confirming data from investigators. | 6-7 |
| 11 | List and define all variables for which data were sought (e.g., PICOS, funding sources) and any assumptions and simplifications made. | 7-8 |
| S1 | Describe methods used to explore the geometry of the treatment network under study and potential biases related to it. This should include how the evidence base has been graphically summarized for presentation, and what characteristics were compiled and used to describe the evidence base to readers. | 8 |
| 12 | Describe methods used for assessing risk of bias of individual studies (including specification of whether this was done at the study or outcome level), and how this information is to be used in any data synthesis. | 8, Supplementary 4 |
| 13 | State the principal summary measures (e.g., risk ratio, difference in means). Also describe the use of additional summary measures assessed, such as treatment rankings and surface under the cumulative ranking curve (SUCRA) values, as well as modified approaches used to present summary findings from meta-analyses. | 8-10 |
| 14 | Describe the methods of handling data and combining results of studies for each network meta-analysis. This should include, but not be limited to:   - Handling of multi-arm trials (included in network without exclusion) - Selection of variance structure (random-effects model) - Assessment of model fit (I² statistic, prediction intervals) | 8-10 |
| S2 | Describe the statistical methods used to evaluate the agreement of direct and indirect evidence in the treatment network(s) studied. Describe efforts taken to address its presence when found. | 9 |
| 15 | Specify any assessment of risk of bias that may affect the cumulative evidence (e.g., publication bias, selective reporting within studies). | 9,  Supplementary 5 |
| 16 | Describe methods of additional analyses if done, indicating which were pre-specified. This may include, but not be limited to, the following:   - Sensitivity or subgroup analyses (not conducted) - Meta-regression analyses (not conducted) - Alternative formulations of the treatment network (not conducted) | 8-10 |
| 17 | Give numbers of studies screened, assessed for eligibility, and included in the review, with reasons for exclusions at each stage, ideally with a flow diagram. | 10, Figure 1 |
| S3 | Provide a network graph of the included studies to enable visualization of the geometry of the treatment network. | Figure 2 |
| S4 | Provide a brief overview of characteristics of the treatment network. This may include commentary on the abundance of trials and randomized patients for the different interventions and pairwise comparisons in the network, gaps of evidence in the treatment network, and potential biases reflected by the network structure. | 10-11 |
| 18 | For each study, present characteristics for which data were extracted (e.g., study size, PICOS, follow-up period) and provide the citations. | Supplementary 3 |
| 19 | Present data on risk of bias of each study and, if available, any outcome level assessment. | 11,  Supplementary 4 |
| 20 | For all outcomes considered (benefits or harms), present, for each study: 1) simple summary data for each intervention group, and 2) effect estimates and confidence intervals. *Modified approaches may be needed to deal with information from larger networks.* | 11-13, Table 1 |
| 21 | Present results of each meta-analysis done, including confidence/credible intervals. In larger networks, authors may focus on comparisons versus a particular comparator (e.g. placebo or standard care), with full findings presented in an appendix. League tables and forest plots may be considered to summarize pairwise comparisons. If additional summary measures were explored (such as treatment rankings), these should also be presented. | Figure 2, Figure 3, and Table 1 |
| S5 | Describe results from investigations of inconsistency. This may include such information as measures of model fit to compare consistency and inconsistency models, *P* values from statistical tests, or summary of inconsistency estimates from different parts of the treatment network. | 11 |
| 22 | Present results of any assessment of risk of bias across studies for the evidence base being studied. | 11,  Supplementary 4 |
| 23 | Give results of additional analyses, if done (e.g., sensitivity or subgroup analyses, meta-regression analyses*, alternative network geometries studied, alternative choice of prior distributions for Bayesian analyses,* and so forth). | 11, Supplementary 5 |
| 24 | Summarize the main findings, including the strength of evidence for each main outcome; consider their relevance to key groups (e.g., healthcare providers, users, and policy-makers). | 14-19 |
| 25 | Discuss limitations at study and outcome level (e.g., risk of bias), and at review level (e.g., incomplete retrieval of identified research, reporting bias). *Comment on the validity of the assumptions, such as transitivity and consistency. Comment on any concerns regarding network geometry (e.g., avoidance of certain comparisons).* | 19-20 |
| 26 | Provide a general interpretation of the results in the context of other evidence, and implications for future research. | 19 |
| 27 | Describe sources of funding for the systematic review and other support (e.g., supply of data); role of funders for the systematic review. This should also include information regarding whether funding has been received from manufacturers of treatments in the network and/or whether some of the authors are content experts with professional conflicts of interest that could affect use of treatments in the network. | 20 |

PICOS = population, intervention, comparators, outcomes, study design.

**Supplementary 2: Search Strategy**

## Database: PubMed <inception to August 31 2025>

***Search Strategy:***

| Search number | Query |
| --- | --- |
| 9 | ((((((( "Exercise"[Mesh] OR "Exercise Therapy"[Mesh] OR "Resistance Training"[Mesh] OR "Yoga"[Mesh] OR "Tai Ji"[Mesh] OR "Dance Therapy"[Mesh] OR "Muscle Stretching Exercises"[Mesh] OR "Weight-Bearing"[Mesh] OR "Physical Therapy Modalities"[Mesh] OR "exercise*"[tiab] OR "train*"[tiab] OR "physical activit*"[tiab] OR "strength training"[tiab] OR "balance training"[tiab] OR "neuromuscular training"[tiab] OR "proprioceptive training"[tiab] OR "postural training"[tiab] OR "dual-task training"[tiab] OR "aquatic exercis*"[tiab] OR "water-based exercis*"[tiab] OR "yoga"[tiab] OR "tai chi"[tiab] OR "taiji"[tiab] OR "qigong"[tiab] OR "pilates"[tiab] OR "dance"[tiab] OR "vibration training"[tiab] OR "sensorimotor training"[tiab] )) OR ("aerobic exercise*"[tiab])) OR ("endurance training"[tiab])) OR ((((((((Acupuncture Therapy[MeSH Terms]) OR (acupuncture[Title/Abstract])) OR ("hand acupuncture"[Title/Abstract])) OR ("manual acupuncture"[Title/Abstract])) OR (electroacupuncture[Title/Abstract])) OR (wet acupuncture[Title/Abstract])) OR (moxibustion[MeSH Terms])) OR (moxibustion[Title/Abstract]))) OR ((((Cognitive Behavioral Therapy[MeSH Terms]) OR ("cognitive behavioral therapy"[Title/Abstract])) OR (mindfulness[Title/Abstract])) OR (meditation[Title/Abstract]))) OR ((((((((Diet Therapy[MeSH Terms]) OR (diet[Title/Abstract])) OR ("dietary intervention"[Title/Abstract])) OR ("nutrition therapy"[Title/Abstract])) OR (nutrition[Title/Abstract])) OR ("lifestyle modification"[Title/Abstract])) OR ("weight management"[Title/Abstract])) OR ("lifestyle intervention"[Title/Abstract]))) OR ((((((((((((((((Physical Therapy Modalities[MeSH Terms]) OR ("manual therapy"[Title/Abstract])) OR (physiotherapy[Title/Abstract])) OR (TENS[Title/Abstract])) OR ("transcutaneous electrical nerve stimulation"[Title/Abstract])) OR (electrotherapy[Title/Abstract])) OR ("low-frequency stimulation"[Title/Abstract])) OR ("infrared therapy"[Title/Abstract])) OR (infrared[Title/Abstract])) OR ("ultrasound therapy"[Title/Abstract])) OR (ultrasound[Title/Abstract])) OR ("laser therapy"[Title/Abstract])) OR ("low level laser"[Title/Abstract])) OR (photobiomodulation[Title/Abstract])) OR ("heat therapy"[Title/Abstract])) OR ("cold therapy"[Title/Abstract])) |
| 8 | ((((((( "Exercise"[Mesh] OR "Exercise Therapy"[Mesh] OR "Resistance Training"[Mesh] OR "Yoga"[Mesh] OR "Tai Ji"[Mesh] OR "Dance Therapy"[Mesh] OR "Muscle Stretching Exercises"[Mesh] OR "Weight-Bearing"[Mesh] OR "Physical Therapy Modalities"[Mesh] OR "exercise*"[tiab] OR "train*"[tiab] OR "physical activit*"[tiab] OR "strength training"[tiab] OR "balance training"[tiab] OR "neuromuscular training"[tiab] OR "proprioceptive training"[tiab] OR "postural training"[tiab] OR "dual-task training"[tiab] OR "aquatic exercis*"[tiab] OR "water-based exercis*"[tiab] OR "yoga"[tiab] OR "tai chi"[tiab] OR "taiji"[tiab] OR "qigong"[tiab] OR "pilates"[tiab] OR "dance"[tiab] OR "vibration training"[tiab] OR "sensorimotor training"[tiab] )) OR ("aerobic exercise*"[tiab])) OR ("endurance training"[tiab])) OR ((((((((Acupuncture Therapy[MeSH Terms]) OR (acupuncture[Title/Abstract])) OR ("hand acupuncture"[Title/Abstract])) OR ("manual acupuncture"[Title/Abstract])) OR (electroacupuncture[Title/Abstract])) OR (wet acupuncture[Title/Abstract])) OR (moxibustion[MeSH Terms])) OR (moxibustion[Title/Abstract]))) OR ((((Cognitive Behavioral Therapy[MeSH Terms]) OR ("cognitive behavioral therapy"[Title/Abstract])) OR (mindfulness[Title/Abstract])) OR (meditation[Title/Abstract]))) OR ((((((((Diet Therapy[MeSH Terms]) OR (diet[Title/Abstract])) OR ("dietary intervention"[Title/Abstract])) OR ("nutrition therapy"[Title/Abstract])) OR (nutrition[Title/Abstract])) OR ("lifestyle modification"[Title/Abstract])) OR ("weight management"[Title/Abstract])) OR ("lifestyle intervention"[Title/Abstract]))) OR ((((((((((((((((Physical Therapy Modalities[MeSH Terms]) OR ("manual therapy"[Title/Abstract])) OR (physiotherapy[Title/Abstract])) OR (TENS[Title/Abstract])) OR ("transcutaneous electrical nerve stimulation"[Title/Abstract])) OR (electrotherapy[Title/Abstract])) OR ("low-frequency stimulation"[Title/Abstract])) OR ("infrared therapy"[Title/Abstract])) OR (infrared[Title/Abstract])) OR ("ultrasound therapy"[Title/Abstract])) OR (ultrasound[Title/Abstract])) OR ("laser therapy"[Title/Abstract])) OR ("low level laser"[Title/Abstract])) OR (photobiomodulation[Title/Abstract])) OR ("heat therapy"[Title/Abstract])) OR ("cold therapy"[Title/Abstract])) |
| 7 | ((((((( "Exercise"[Mesh] OR "Exercise Therapy"[Mesh] OR "Resistance Training"[Mesh] OR "Yoga"[Mesh] OR "Tai Ji"[Mesh] OR "Dance Therapy"[Mesh] OR "Muscle Stretching Exercises"[Mesh] OR "Weight-Bearing"[Mesh] OR "Physical Therapy Modalities"[Mesh] OR "exercise*"[tiab] OR "train*"[tiab] OR "physical activit*"[tiab] OR "strength training"[tiab] OR "balance training"[tiab] OR "neuromuscular training"[tiab] OR "proprioceptive training"[tiab] OR "postural training"[tiab] OR "dual-task training"[tiab] OR "aquatic exercis*"[tiab] OR "water-based exercis*"[tiab] OR "yoga"[tiab] OR "tai chi"[tiab] OR "taiji"[tiab] OR "qigong"[tiab] OR "pilates"[tiab] OR "dance"[tiab] OR "vibration training"[tiab] OR "sensorimotor training"[tiab] )) OR ("aerobic exercise*"[tiab])) OR ("endurance training"[tiab])) OR ((((((((Acupuncture Therapy[MeSH Terms]) OR (acupuncture[Title/Abstract])) OR ("hand acupuncture"[Title/Abstract])) OR ("manual acupuncture"[Title/Abstract])) OR (electroacupuncture[Title/Abstract])) OR (wet acupuncture[Title/Abstract])) OR (moxibustion[MeSH Terms])) OR (moxibustion[Title/Abstract]))) OR ((((Cognitive Behavioral Therapy[MeSH Terms]) OR ("cognitive behavioral therapy"[Title/Abstract])) OR (mindfulness[Title/Abstract])) OR (meditation[Title/Abstract]))) OR ((((((((Diet Therapy[MeSH Terms]) OR (diet[Title/Abstract])) OR ("dietary intervention"[Title/Abstract])) OR ("nutrition therapy"[Title/Abstract])) OR (nutrition[Title/Abstract])) OR ("lifestyle modification"[Title/Abstract])) OR ("weight management"[Title/Abstract])) OR ("lifestyle intervention"[Title/Abstract]))) OR ((((((((((((((((Physical Therapy Modalities[MeSH Terms]) OR ("manual therapy"[Title/Abstract])) OR (physiotherapy[Title/Abstract])) OR (TENS[Title/Abstract])) OR ("transcutaneous electrical nerve stimulation"[Title/Abstract])) OR (electrotherapy[Title/Abstract])) OR ("low-frequency stimulation"[Title/Abstract])) OR ("infrared therapy"[Title/Abstract])) OR (infrared[Title/Abstract])) OR ("ultrasound therapy"[Title/Abstract])) OR (ultrasound[Title/Abstract])) OR ("laser therapy"[Title/Abstract])) OR ("low level laser"[Title/Abstract])) OR (photobiomodulation[Title/Abstract])) OR ("heat therapy"[Title/Abstract])) OR ("cold therapy"[Title/Abstract])) |
| 6 | (((((((((((((((Physical Therapy Modalities[MeSH Terms]) OR ("manual therapy"[Title/Abstract])) OR (physiotherapy[Title/Abstract])) OR (TENS[Title/Abstract])) OR ("transcutaneous electrical nerve stimulation"[Title/Abstract])) OR (electrotherapy[Title/Abstract])) OR ("low-frequency stimulation"[Title/Abstract])) OR ("infrared therapy"[Title/Abstract])) OR (infrared[Title/Abstract])) OR ("ultrasound therapy"[Title/Abstract])) OR (ultrasound[Title/Abstract])) OR ("laser therapy"[Title/Abstract])) OR ("low level laser"[Title/Abstract])) OR (photobiomodulation[Title/Abstract])) OR ("heat therapy"[Title/Abstract])) OR ("cold therapy"[Title/Abstract]) |
| 5 | (((((((Diet Therapy[MeSH Terms]) OR (diet[Title/Abstract])) OR ("dietary intervention"[Title/Abstract])) OR ("nutrition therapy"[Title/Abstract])) OR (nutrition[Title/Abstract])) OR ("lifestyle modification"[Title/Abstract])) OR ("weight management"[Title/Abstract])) OR ("lifestyle intervention"[Title/Abstract]) |
| 4 | (((Cognitive Behavioral Therapy[MeSH Terms]) OR ("cognitive behavioral therapy"[Title/Abstract])) OR (mindfulness[Title/Abstract])) OR (meditation[Title/Abstract]) |
| 3 | (((((((Acupuncture Therapy[MeSH Terms]) OR (acupuncture[Title/Abstract])) OR ("hand acupuncture"[Title/Abstract])) OR ("manual acupuncture"[Title/Abstract])) OR (electroacupuncture[Title/Abstract])) OR (wet acupuncture[Title/Abstract])) OR (moxibustion[MeSH Terms])) OR (moxibustion[Title/Abstract]) |
| 2 | ((( "Exercise"[Mesh] OR "Exercise Therapy"[Mesh] OR "Resistance Training"[Mesh] OR "Yoga"[Mesh] OR "Tai Ji"[Mesh] OR "Dance Therapy"[Mesh] OR "Muscle Stretching Exercises"[Mesh] OR "Weight-Bearing"[Mesh] OR "Physical Therapy Modalities"[Mesh] OR "exercise*"[tiab] OR "train*"[tiab] OR "physical activit*"[tiab] OR "strength training"[tiab] OR "balance training"[tiab] OR "neuromuscular training"[tiab] OR "proprioceptive training"[tiab] OR "postural training"[tiab] OR "dual-task training"[tiab] OR "aquatic exercis*"[tiab] OR "water-based exercis*"[tiab] OR "yoga"[tiab] OR "tai chi"[tiab] OR "taiji"[tiab] OR "qigong"[tiab] OR "pilates"[tiab] OR "dance"[tiab] OR "vibration training"[tiab] OR "sensorimotor training"[tiab] )) OR ("aerobic exercise*"[tiab])) OR ("endurance training"[tiab]) |
| 1 | (((((((Endometriosis[MeSH Terms]) OR (endometriosis[Title/Abstract])) OR (endometriotic[Title/Abstract])) OR (adenomyosis[Title/Abstract])) OR (endometrosis[Title/Abstract])) OR (Endometrioses[Title/Abstract])) OR (Endometrioma[Title/Abstract])) OR (Endometriomas[Title/Abstract]) |

# Supplementary 3: Characteristics of studies and subjects included in the review

| **Study** | **Study Design** | **Country/Region** | **Subjects**  **(intervention/ control)** | **Mean age**  **(intervention/ control)** | **BMI** | **Intervention detail** | | **Treatment cycle** | **Adherence** | **Outcomes** |
| --- | --- | --- | --- | --- | --- | --- | --- | --- | --- | --- |
| **Intervention group** | **Control group** |
| Gonçalves et al. (2017)25 | Open-label RCT | Brazil | 40 (28/12) | 34.50 ± 7.40 vs. 35.75 ± 4.70 | 28.30 ± 1.20 vs. 26.00 ± 1.40 | Hatha Yoga (breathing/meditation/postures) Each session lasts approximately 120 minutes 2 times a week for 8 weeks | Conventional outpatient treatment (drugs) | 8 weeks | 16/28（57%） | Pain, Mental health |
| Almassinokiani et al. (2016)30 | Double-blind RCT | Iran | 38 (19/19) | 30.84 ± 5.79 vs 28.95 ± 4.71 | 22.46 vs 23.00 | Oral vitamin D3 (D-Vigel capsules, 50,000 IU/week) Once a week | Oral placebo (same-looking capsules) | 12 weeks | 19/19 (100%) | Pelvic pain, Dysmenorrhea |
| Cobellis et al. (2011)33 | Double-blind RCT | Italy | 41 (21/20) | 26–37 vs 25–41 | NA | Micronized N-Palmitoylethanolamine 400 mg + transpolydatin 40 mg, taken orally twice daily for 3 months | Placebo, oral, twice daily, 3 months | 12 weeks | 21/21 (100%) | Pelvic pain, Dysmenorrhea |
| Del Forno et al. (2021)27 | Open-label RCT | Italy | 30 (17/13) | 32.5 ± 7.6 vs. 32.8 ± 6.7 | 22.1 ± 3.5 vs. 21.7 ± 4.4 | Pelvic floor physiotherapy (PFP), 5 individual sessions, 30 min each, Administered at weeks 1, 3, 5, 8, 11, Thiele massage technique | Maintain usual care, no physical intervention | 11 weeks | 17/17 (100%) | Pelvic pain, Dysmenorrhea |
| Amirsalari et al. (2021)28 | Double-blind RCT | Iran | 120 (60/60) | 29.41 ± 8.54 vs. 29.71 ± 5.67 | 22.21 ± 4.32 vs. 21.85 ± 3.43 | Garlic tablets (400 mg dried garlic powder, 1100 µg allicin), 1 tablet/day, 12 weeks | Identical placebo tablets, 1 tablet/day, 12 weeks | 12 weeks | NA | Pain, Pelvic pain, Dysmenorrhea |
| Farshi et al. (2020)26 | Open-label RCT | Iran | 76 (38/38) | 31.10 ± 6.35 vs. 31.65 ± 6.11 | NA | Self-care counseling sessions (90 minutes per week) include disease education, dietary advice, exercise, relaxation and stress management, and medication use guidance | Usual care (no additional consultations or classes) | 8 weeks | 38/38 (100%) | Pain, QoL, Mental health |
| Hansen et al. (2023)24 | Double-blind RCT | Denmark | 58 (19/19/16) | 28.95 ± 7.84 vs. 33.84 ± 7.69 vs. 32.81 ± 9.01 | NA | (a) Mindfulness-Based Stress Reduction (MBSR) + Acceptance and Commitment Therapy (ACT) Modified; 10 weeks, 3 hours of group classes per week + daily home practice (mindfulness meditation and yoga, 30–45 minutes, 5–7 days/week) (b) The nonspecific component of the psychological intervention was retained (also 10 weeks, 3 hours per week); home practice consisted of relaxation music + physical exercise (30–45 minutes, 5–7 days/week) | Waiting list + conventional medical/surgical treatment | 10 weeks | NA | Pelvic pain, QoL, Mental health |
| Lutfi et al. (2023)32 | Open-label RCT | Australia | 19 (7/8/4) | 29 ± 7 vs. 27 ± 7 vs. 25 ± 4 | 25 ± 4 vs. 23 ± 4 vs. 26 ± 2 | (a) Telehealth exercise: Single 1-hour session, including aerobic exercise (interval training 3×4 minutes + recovery 2 minutes), core stabilization exercises, and stretching exercises (b) VR exercise: Single 1-hour session, including 10 minutes of VR pain distraction program + 50 minutes of exercise | Maintain daily life (no additional intervention) | 1 week | 19/22 (86%) | Pain |
| Rodríguez-Ruiz et al. (2024)19 | Open-label RCT | Spain | 44 (21/23) | 35.33 ± 6.65 vs. 35.26 ± 5.77 | 26.30 ± 3.93 vs. 26.83 ± 6.41 | HAMMAM Arabic Baths Experience (hot water, cold water, steam bath, hot stone platform) + Full Body Swedish Massage (first two 15-minute Swedish massages; the last one includes a 15-minute Kessa massage) | Conventional drug treatment | 4 weeks | 21/21 (100%) | Pelvic pain, Dysmenorrhea |
| Mehdizadehkashi et al. (2021)23 | Double-blind RCT | Iran | 50 (25/25) | 34.8 ± 7.1 vs. 35.6 ± 7.0 | 23.8 ± 3.6 vs. 25.6 ± 3.4 | Vitamin D 50,000 IU orally every 2 weeks for 12 weeks | Matching placebo capsule, every 2 weeks for 12 weeks | 12 weeks | 25/30 (83%) | Dysmenorrhea |
| Meissner et al. (2016)22 | Open-label RCT | Germany | 67 (35/32) | 35.0 ± 6.7 vs. 36.2 ± 6.4 | 21.7 ± 2.5 vs. 23.1 ± 2.6 | Psychotherapy + somatosensory stimulation (mindfulness, CBT, hypnotherapy, problem-solving, acupuncture points, moxibustion, cupping), ~8–10 sessions over 3 months. | Wait-list (usual gynecological care, analgesics as needed) | 12 weeks | NA | Pain, Pelvic pain, QoL, Mental health |
| Moreira et al. (2022)21 | Open-label RCT | Brazil | 63 (31/32) | 37.67 ± 7.29 vs. 34.68 ± 8.09 | 26.40 ± 6.05 vs. 28.10 ± 6.72 | Participants received 90-minute, weekly group sessions for four weeks, followed by a three-week follow-up period with weekly online mindfulness practice. They were encouraged to meditate for 20–30 minutes daily, and to integrate shorter exercises such as the "3-minute breathing space" into their daily mindfulness activities. | Standard medical care/routine care | 4 weeks | NA | Pelvic pain, Dysmenorrhea |
| Nodler et al. (2020)20 | Double-blind RCT | USA | 69 (27/20/32) | 20.0±2.7 vs. 18.9±3.1 vs. 20.1±3.5 | 26.2±5.7 vs. 26.4±5.6 vs. 25.6±5.1 | (a) Oral vitamin D3 2000 IU/day for 6 months (b) Oral fish oil 1000 mg/day (containing 720 mg total omega-3: EPA 488 mg, DHA 178 mg) for 6 months | The capsules in each group were identical in appearance (packaged in the research pharmacy), and the investigators and subjects were double-blinded. | 24 weeks | NA | Pain, QoL, Mental health |
| Amini et al. (2021)29 | Double-blind RCT | Iran | 60 (30/30) | 35.7 ± 5.71 vs. 38.03 ± 6.47 | 25.12 ± 4.02 vs. 25.54 ± 3.86 | Vitamin C + E group: vitamin C 1000 mg/day (500 mg × 2), vitamin E 800 IU/day (400 IU × 2), for 8 weeks | Placebo capsules, daily, 8 weeks | 8 weeks | NA | Pain, Pelvic pain, Dysmenorrhea |
| Rubi-Klein et al. (2010)18 | randomised controlled cross-over trial | Austria | 101 (47/54) | 34.8 vs 32.5 | NA | Verum acupuncture (specific acupoints): The basic prescription includes BL32, ST29, ST36, REN3, SP6, and up to three modified acupoints (such as LR3, LR8, SP9, SP10, KI10, etc.) can be added according to syndrome differentiation. | Non-acupoint acupuncture | 5 weeks | 83/101（79.8%） | Pain |
| Thabet et al. (2018)17 | Open-label RCT | Saudi Arabia & Egypt | 40 (20/20) | NA | NA | Pulsed Nd:YAG (1064 nm), peak power 3 kW; three-phase protocol, total energy approximately 1300 J, approximately 20 minutes per session, 3 times/week for 8 weeks | Sham laser, 3 times/week × 8 weeks | 8 weeks | NA | Pain, QoL |
| Wayne et al. (2008)16 | Open-label RCT | USA | 18 (10/8) | 17.8 ± 2.1 vs. 17.0 ± 2.1 | NA | Japanese acupuncture: Individualized acupoint selection (approximately 8–12 acupoints per session; 2 times/week for 8 consecutive weeks, a total of 16 sessions) | Use the non-puncture Streitberger device placed on non-acupuncture points | 8 weeks | 9/10 (90%) | Pain, QoL, Mental health |
| Zhao et al. (2012)31 | Open-label RCT | China | 100 (50/50) | NA | NA | Progressive muscle relaxation, group training 40 minutes/session, 2 times/week, for 12 weeks (24 sessions); home practice approximately 2 times/day | Leuprorelin 11.25 mg IM only (1 dose) without PMR | 12 weeks | NA | QoL, Mental health |
| Fang et al. (2024)35 | Open-label RCT | China | 102 (51/51) | 33.01±2.27 vs. 32.85±3.31 | 23.74±1.31 vs. 23.70±1.34 | Moxibustion acupoints: Shenque, Tianshu, Guanyuan, Zhongji; start 3 days before menstruation to 2 days after menstruation, 2 times/day, each time 20-30 minutes; ear acupoint pressing: start 3 days before menstruation to 2 days after menstruation, press 3-4 times/day, change sides every 3 days. | Routine care | 12 weeks | NA | Pain, Pelvic pain, QoL |
| Ni et al. (2020)34 | Open-label RCT | China | 70 (35/35) | 32.29 ± 2.31 vs. 31.82 ± 2.54 | NA | Moxibustion points: Guanyuan, Tianshu, Zhongji, Shenque; Auricular pressure points: Uterus, Shenmen, Endocrine, Sympathetic, Kidney, Liver, Subcortical; | Dydrogesterone tablets: Take orally on days 5–25 of menstruation (1 tablet twice daily) | 12 weeks | NA | Pain, Pelvic pain, QoL |
| Sun et al. (2012)36 | Open-label RCT | China | 62 (32/30) | 33.15±3.12 vs. 34.54±3.71 | NA | Bo's abdominal acupuncture + infrared (treatment group): Acupoints: Guiding Qi to the Origin (Zhongwan, Xiawan, Qihai, Guanyuan) + Zhongji as the basic prescription; add or subtract according to symptom location and syndrome type | Manual acupuncture, No infrared added. | 4 weeks | NA | Dysmenorrhea |
| Liu et al. (2013)37 | Open-label RCT | China | 30 (15/15) | 36.23±3.21 vs. 37.45±3.56 | NA | Electroacupuncture + TDP: Guanyuan, Zhongji, uterus, Zusanli, Sanyinjiao, Diji (adjust according to symptoms). Electroacupuncture: Both sides of the uterus and Sanyinjiao. KWD-808 electroacupuncture instrument, 2 Hz, intensity as tolerated, needles in place for 30 minutes. TDP: TDP irradiation of the lower abdomen for 30 minutes. | Manual acupuncture | 12 weeks | NA | Dysmenorrhea |
| Sun et al. (2007)38 | Open-label RCT | China | 64 (32/32) | Ages 18–43, average 32 | NA | Acupoints: Bilateral uterine, subcortical/Shenmen, and endocrine points are the primary focus; 1–2 liver/kidney/sympathetic points are also included depending on the syndrome. Treatment is performed 3 times per week (once every other day) for a total of 4 courses. | Manual acupuncture, Acupuncture points: Tianshu, Qihai, Zhongji, Guanyuan, Sanyinjiao, Diji. Needle retention for 30 minutes, 3 times a week, 10 times/treatment course, 7 days off, 4 courses in total | 12 weeks | NA | Dysmenorrhea |
| Du et al. (2025)39 | Open-label RCT | China | 200 (100/100) | 35.21±4.96 vs 35.14±5.03 | 22.38±2.85 vs 22.41±2.62 | Acupoints: Sanyinjiao, uterus, Qihai, Guanyuan, Diji, Zhongji, etc. After rapid straight insertion with the reddened needle tip (three times per acupoint), leave the needle in Zhongji/Qihai/Guanyuan, place a moxa cone on the needle handle and light it, and leave the needle in for about 30 minutes. | Gestrinone, no acupuncture | 12 weeks | NA | Pain |
| Sun et al. (2019)45 | Open-label RCT | China | 80 (40/40) | 32±6 vs 33±7 | NA | Acupuncture at the Guanyuan, Sanyinjiao, Qihai, and uterus points, 3 times a week for 12 weeks | Tanshinone capsules + painkillers | 12 weeks | NA | Pain, QoL, Mental health |
| Niu et al. (2014)41 | Open-label RCT | China | 60 (31/29) | 24.71± 3.8 vs. 24.71± 5.2 | NA | Four-step moxibustion method (Guanyuan, Zhongji, Uterus, Sanyinjiao), frequency: once a day for 3 consecutive menstrual cycles (≈12 weeks) | Pingchong Huayu Tongluo prescription taken orally (mainly before and during menstruation) | 12 weeks | NA | Pain |
| Wang et al. (2019)42 | Open-label RCT | China | 198 (99/97) | 35.0 ± 4.8 vs. 35.0 ± 4.8 | NA | Cognitive behavioral intervention (CBT): once a week, 30–45 min per session, for 4 consecutive weeks; implemented by nurses with psychological counseling qualifications. | Electroacupuncture (once a day until egg retrieval day) | 4 weeks | NA | Pain, Mental health |
| Qu et al. (2022)44 | Open-label RCT | China | 84 (42/42) | 28.34 ± 2.28 vs. 28.72 ± 2.47 | 21.68 ± 1.38 vs. 21.37 ± 1.41 | NMES (neuromuscular electrical stimulation) + conventional medication, acupoints: bilateral Sanyinjiao, Zhongji, Guanyuan, frequency 2–100 Hz, bandwidth 50–200 μs, current ≤20 mA, 30–60 min per session, 3 times a week | Conventional drug treatment (gestrinone tablets + goserelin subcutaneous injection, once every 4 weeks) | 12 weeks | NA | QoL, Mental health |
| Chen et al. (2023)43 | Open-label RCT | China | 70 (35/35) | 28.72 ± 1.76 vs. 28.14 ± 1.35 | NA | External high-frequency hyperthermia device, frequency 13.56 MHz, power 360–480 W, temperature 38–41°C, once a day, 30 min each time | Ethinylestradiol and cyproterone acetate tablets, 1 tablet/day, 21 days as a cycle, 7 days off, a total of 2 cycles | 12 weeks | NA | Pain, Dysmenorrhea, Mental health |
| Chen et al. (2010)46 | Open-label RCT | China | 73 (36/37) | 30.7±5.48 vs. 30.2±8.21 | NA | Acupuncture points: Zhongji, Guanyuan, uterus, Sanyinjiao; add or subtract based on syndrome differentiation; acupoint application: Chinese herbal powder (such as Curcuma zedoaria, Trigonosciadium japonicum, frankincense, myrrh, and raw pollen) plus ginger juice, applied externally for 6–8 hours; frequency: once daily | Oral administration of Jiawei Meijie tablets, starting one week before menstruation, 3 times a day, 4 tablets each time, for 14 consecutive days as a course of treatment, for a total of 3 menstrual cycles | 12 weeks | NA | Pain |
| Sun et al. (2021)40 | Single-blind RCT | China | 80 (40/40) | 22-40 years | NA | Electroacupuncture: Select Qihai, Guanyuan, Qixue, Taixi, Dahe, Gongzi, and Diji acupoints, insert the needle 4–7 cm deep, connect the electroacupuncture at 20 Hz, 1–4 mA, and leave the needle in place for 20 minutes; administer three times a week, stopping during menstruation; one course of treatment is one month, for a total of three courses | Placebo acupuncture (shallow needling on non-meridian or non-acupoints + no current output) + Chinese medicine Tongbining Granules | 12 weeks | NA | Pain |
| Shen et al. (2017)47 | Open-label RCT | China | 50 (25/25) | 36±3 vs. 34±4 | NA | Acupuncture + warm needling, select Qihai, Guanyuan, Zhongji, Gongyu, Xuehai, Sanyinjiao and other acupoints, 30 minutes each time, once every other day, stop needling during menstruation, the course of treatment is 6 months | Mifepristone 12.5 mg tablets orally once a day for 6 months | 24 weeks | NA | Pain |
| Li et al. (2019)48 | Open-label RCT | China | 66 (33/33) | 31.06 ± 10.17 vs. 31.55 ± 10.25 | NA | Mindfulness training, once a week, 1.5 hours each time, for 4 consecutive weeks, including mindfulness meditation, walking mindfulness, mindfulness yoga, and body scan. | Routine care, including vital signs monitoring, surgical cooperation, and daily care. | 4 weeks | NA | Pain |

(N/A None available, RCT Randomized Controlled Trial, PFP Pelvic Floor Physiotherapy, MBSR Mindfulness-Based Stress Reduction, ACT Acceptance and Commitment Therapy, VR Virtual Reality, CBT Cognitive Behavioral Therapy, PMR Progressive Muscle Relaxation, NMES Neuromuscular Electrical Stimulation, TDP Teding Diancibo Pu lamp, QoL Quality of Life, NA Not applicable).

# Supplementary 4: Risk of Bias

## Supplementary table 4 The risk of bias assessment for the individual included studies

| **Study** | Randomization process | Deviations from intended interventions | Missing outcome data | Measurement of the outcome | Selection of the reported result | Overall Bias |
| --- | --- | --- | --- | --- | --- | --- |
| Gonçalves et al. (2017)25 | Some concerns | Some concerns | Some concerns | Low | Low | Some concerns |
| Almassinokiani et al. (2016)30 | Low | Low | Low | Low | Low | Low |
| Cobellis et al. (2011)33 | Low | Low | Low | Low | Low | Low |
| Del Forno et al. (2021)27 | Low | Low | Low | Low | Low | Low |
| Amirsalari et al. (2021)28 | Low | Low | Low | Low | Low | Low |
| Farshi et al. (2020)26 | Low | Some concerns | Some concerns | Low | Low | Some concerns |
| Hansen et al. (2023)24 | Low | Some concerns | Low | Low | Low | Some concerns |
| Lutfi et al. (2023)32 | Low | Low | Low | Low | Low | Low |
| Rodríguez-Ruiz et al. (2024)19 | Low | Low | Low | Low | Low | Low |
| Mehdizadehkashi et al. (2021)23 | Low | Some concerns | Some concerns | Low | Low | Some concerns |
| Meissner et al. (2016)22 | Some concerns | Low | Some concerns | Low | Low | Some concerns |
| Moreira et al. (2022)21 | Some concerns | Low | Some concerns | Low | Low | Some concerns |
| Nodler et al. (2020)20 | Low | Low | Some concerns | Low | Low | Some concerns |
| Amini et al. (2021)29 | Low | Low | Low | Low | Low | Low |
| Rubi-Klein et al. (2010)18 | Low | Low | Low | Low | Low | Low |
| Thabet et al. (2018)17 | Low | Low | Low | Low | Low | Low |
| Wayne et al. (2008)16 | Low | Low | Low | Low | Low | Low |
| Zhao et al. (2012)31 | Low | Low | Some concerns | Low | Low | Some concerns |
| Fang et al. (2024)35 | Low | Low | Low | Low | Low | Low |
| Ni et al. (2020)34 | Low | Low | Some concerns | Low | Low | Some concerns |
| Sun et al. (2012)36 | Low | Some concerns | Some concerns | Low | Low | Some concerns |
| Liu et al. (2013)37 | Low | Low | Low | Low | Low | Low |
| Sun et al. (2007)38 | Low | Low | Low | Low | Low | Low |
| Du et al. (2025)39 | Low | Low | Low | Low | Low | Low |
| Sun et al. (2019)45 | Low | Some concerns | Low | Low | Low | Some concerns |
| Niu et al. (2014)41 | Low | Low | Low | Low | Low | Low |
| Wang et al. (2019)42 | Low | Some concerns | Some concerns | Low | Low | Some concerns |
| Qu et al. (2022)44 | Low | Low | Low | Low | Low | Low |
| Chen et al. (2023)43 | Low | Low | Low | Low | Low | Low |
| Chen et al. (2010)46 | Low | Low | Low | Low | Low | Low |
| Sun et al. (2021)40 | Low | Low | Low | Low | Low | Low |
| Shen et al. (2017)47 | Low | Low | Some concerns | Low | Low | Some concerns |
| Li et al. (2019)48 | Low | Low | Low | Low | Low | Low |

# Supplementary 5: Publication bias


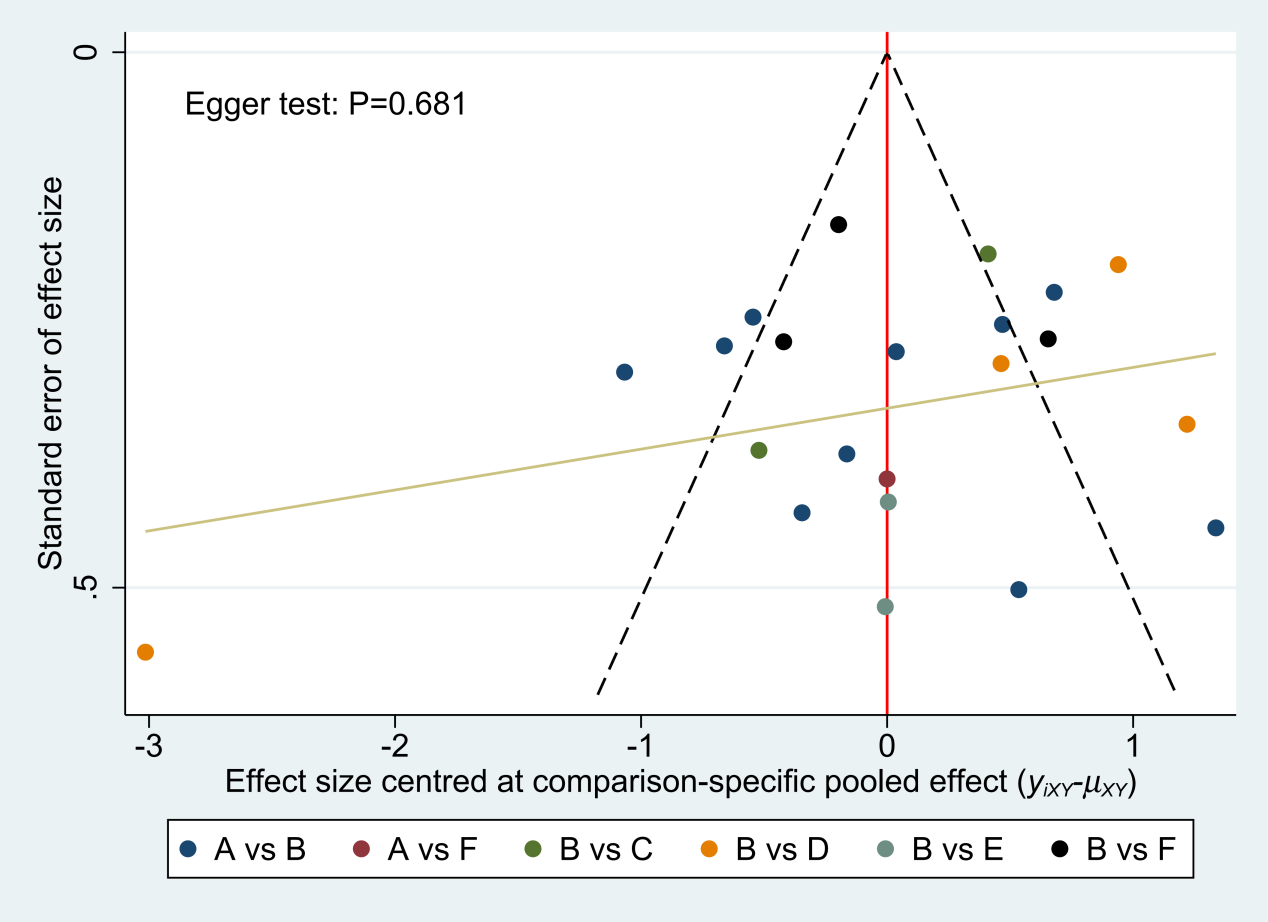


5a The funnel plot of Pain. The result of Egger test showed the p=0.681.


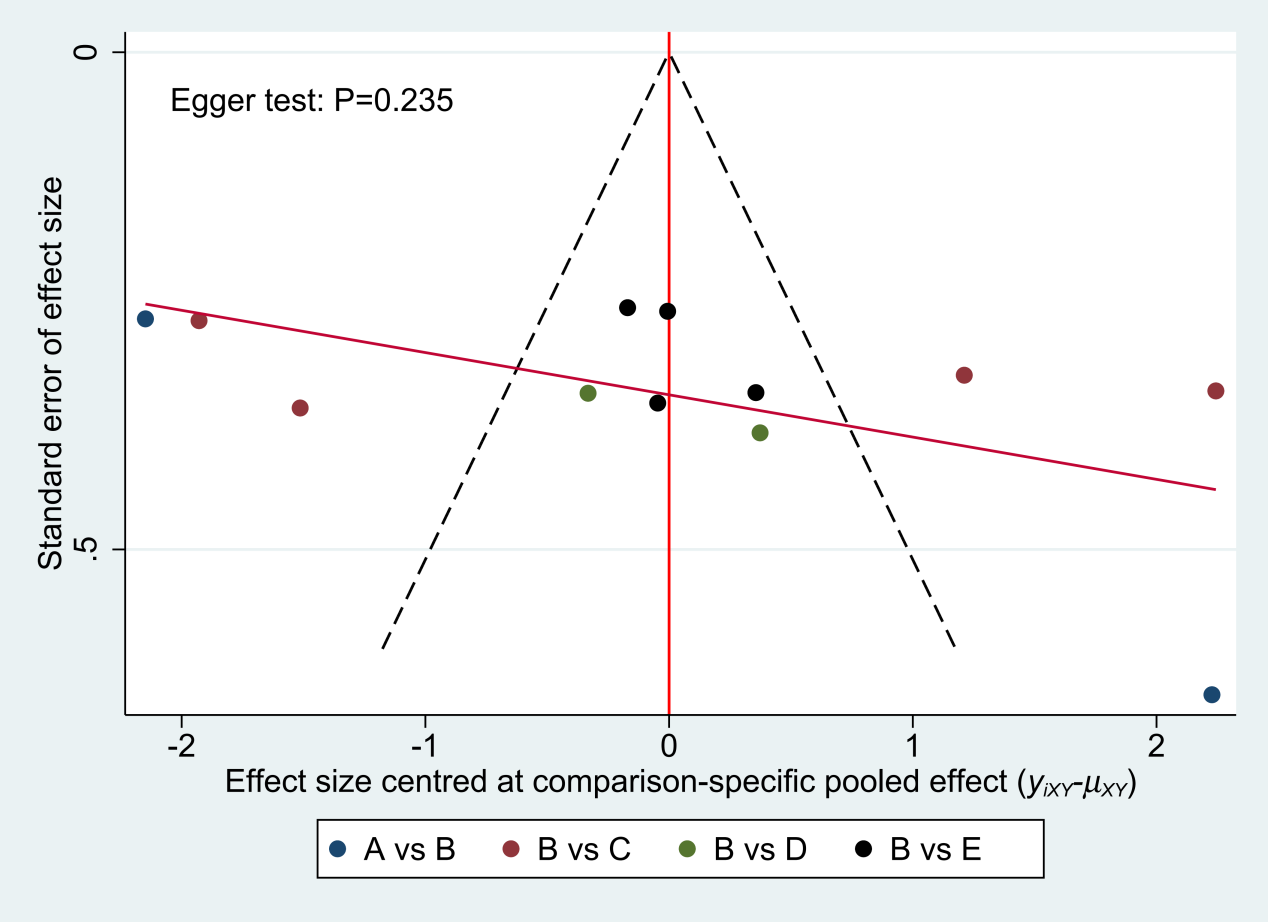


5b The funnel plot of Pelvic pain. The result of Egger test showed the p=0.235.


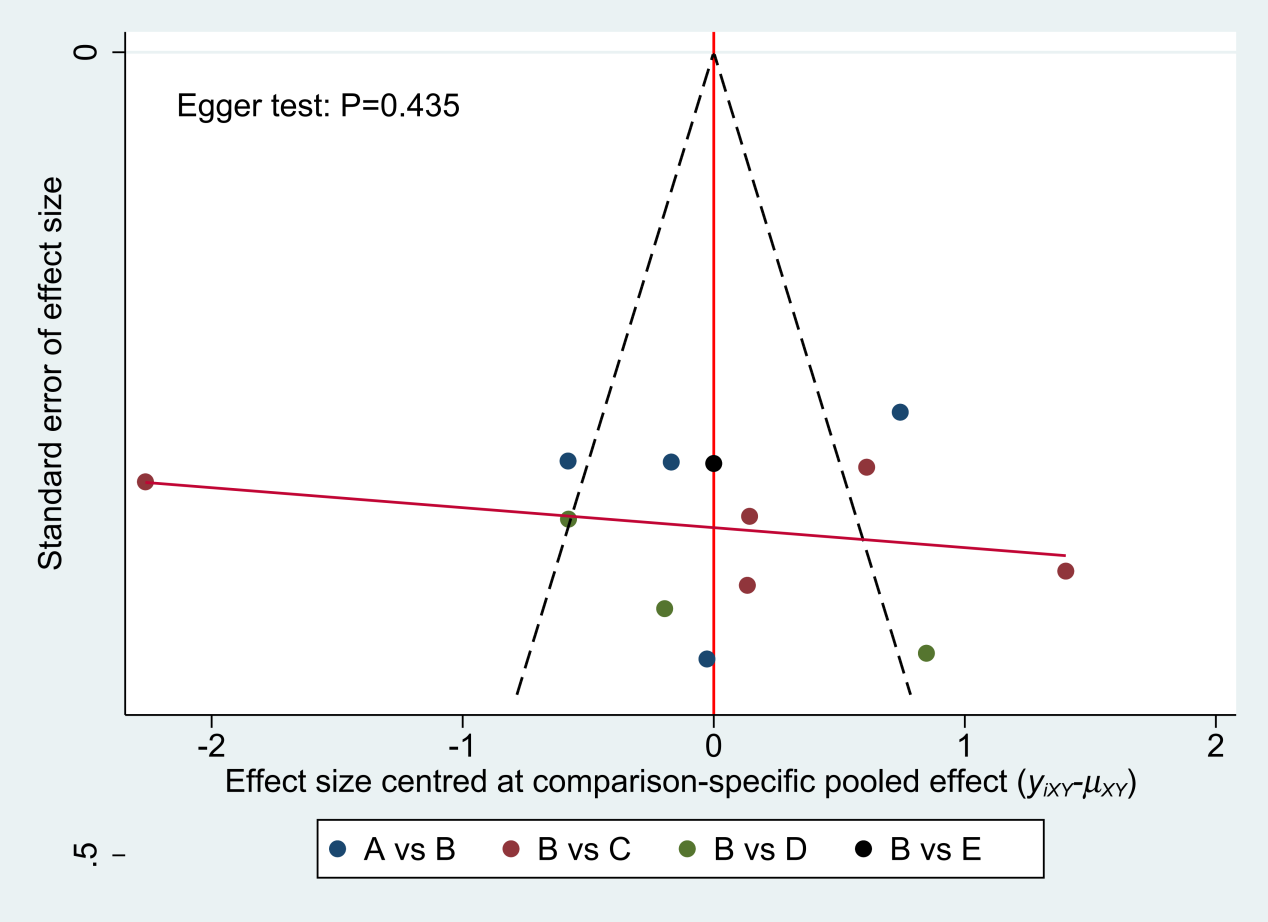


5c The funnel plot of Dysmenorrhea. The result of Egger test showed the p=0.435.


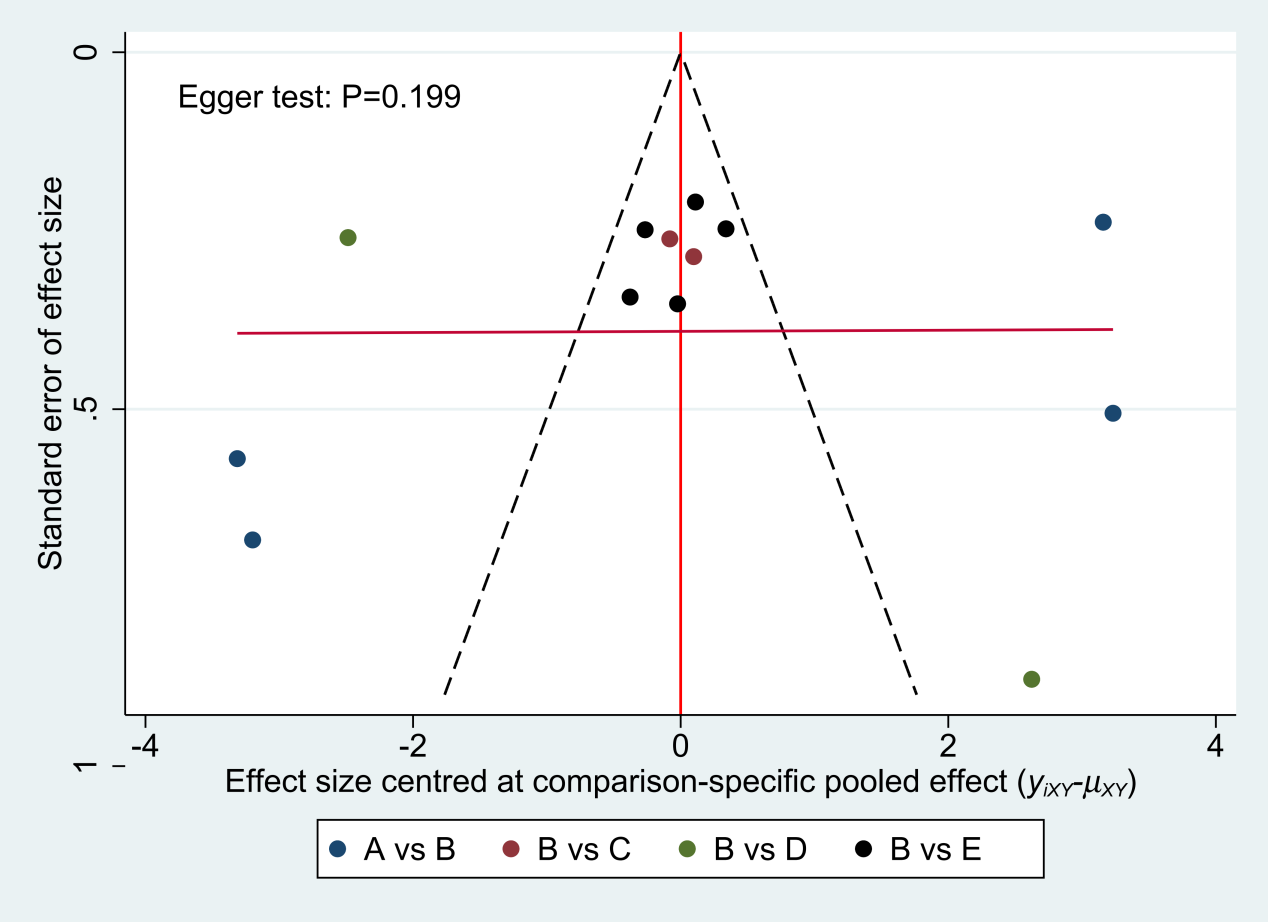


5d The funnel plot of Quality of life. The result of Egger test showed the p=0.199.


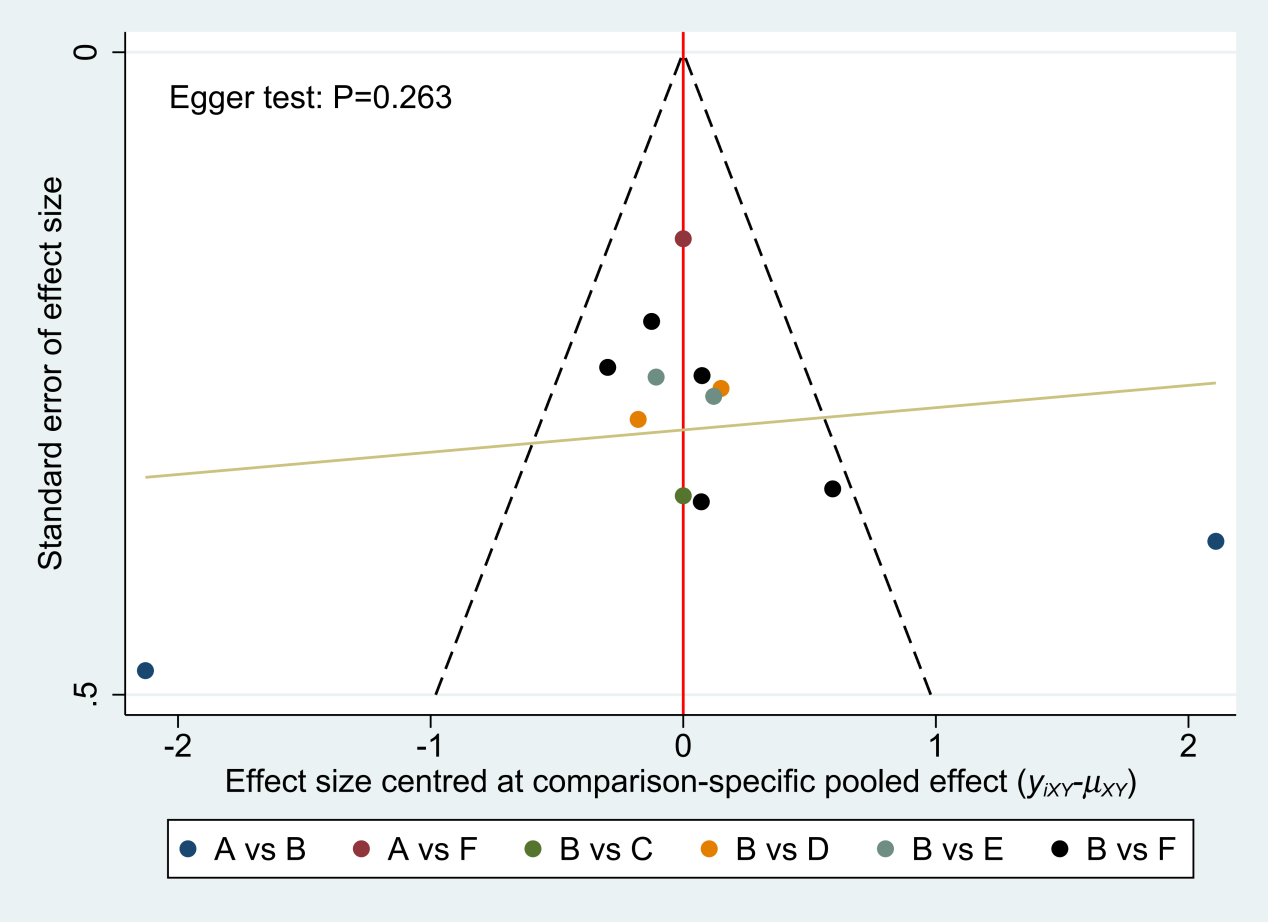


5e The funnel plot of Mental health. The result of Egger test showed the p=0.263.
